# Supplementary material
Source: MDPI journal article supplement (https://www.mdpi.com/2624-795X/5/2/23)
Supplement: s1 [file s1]

**Table S1 Shows the various LULC classes covers.**

| Watershed Number | Land use/ Land cover area in sq.km |        |     |        |        |        |        |        |        |
|------------------|------------------------------------|--------|-----|--------|--------|--------|--------|--------|--------|
|                  | BUL                                | WB     | WL  | PL     | CL     | FL     | LWOS   | LWS    | WAL    |
| 1                | 0.4855                             | 0.3507 | --- | 0.8456 | 5.5321 | 0.042  | ---    | ---    | ---    |
| 2                | 0.0482                             | 0.4183 | --- | ---    | 6.7271 | ---    | 0.272  | 0.5138 | ---    |
| 3                | 0.5186                             | 0.2356 | --- | 1.3449 | 4.3119 | ---    | ---    | ---    | ---    |
| 4                | 0.3597                             | 0.2551 | --- | 0.6071 | 3.7386 | ---    | ---    | 0.0147 | ---    |
| 5                | 0.2741                             | 0.3051 | --- | 0.8444 | 2.1904 | 0.0095 | 0.1223 | ---    | ---    |
| 6                | 0.5623                             | 0.4902 | --- | 2.401  | 5.9255 | 0.0019 | ---    | ---    | ---    |
| 7                | 0.0893                             | 0.0673 | --- | ---    | 3.2319 | ---    | 0.7574 | 2.275  | ---    |
| 8                | 0.2144                             | 0.3591 | --- | 2.6731 | 3.6912 | 0.2101 | 0.083  | ---    | ---    |
| 9                | 0.0793                             | 0.068  | --- | ---    | 3.3877 | ---    | 0.1012 | 0.8148 | ---    |
| 10               | 0.248                              | 0.173  | --- | 0.0007 | 3.2994 | ---    | ---    | ---    | ---    |
| 11               | 0.1853                             | 0.3794 | --- | 0.6307 | 4.1644 | 0.041  | 0.02   | ---    | ---    |
| 12               | 0.4416                             | 0.0546 | --- | 2.3262 | 2.6274 | ---    | 0.3047 | 0.0394 | ---    |
| 13               | 0.1959                             | 0.2985 | --- | 0.1815 | 4.6688 | 2.5315 | 0.2235 | 0.3198 | ---    |
| 14               | ---                                | 0.0532 | --- | 0.2859 | 0.7885 | ---    | 0.0001 | 1.6074 | ---    |
| 15               | 0.0183                             | 0.3051 | --- | 0.4128 | 2.0271 | ---    | ---    | ---    | 0.0927 |
| 16               | ---                                | 0.0013 | --- | 0.1319 | 1.4712 | ---    | ---    | ---    | 0.7633 |
| 17               | 0.0431                             | 0.2121 | --- | 0.4577 | 2.6062 | ---    | 0.0917 | ---    | ---    |
| 18               | 0.2293                             | 0.1215 | --- | ---    | 1.5183 | 1.1694 | ---    | ---    | ---    |
| 19               | 0.4135                             | 0.207  | --- | ---    | 4.6362 | ---    | ---    | 0.0971 | ---    |
| 20               | 0.4311                             | 0.8745 | --- | 1.4583 | 3.5103 | 0.0275 | ---    | ---    | 0.4874 |
| 21               | 1.3315                             | 0.4694 | --- | 0.0355 | 3.4142 | ---    | ---    | ---    | ---    |
| 22               | ---                                | 0.5043 | --- | 3.9419 | 0.0449 | 4.1068 | ---    | ---    | ---    |
| 23               | 0.3614                             | 0.2168 | --- | 0.3327 | 2.6465 | ---    | ---    | 0.2817 | ---    |
| 24               | 0.3167                             | 0.2398 | --- | 1.1334 | 2.8764 | 2.426  | 0.4984 | 0.4822 | ---    |
| 25               | 0.4274                             | 0.1359 | --- | 0.1714 | 0.2354 | 2.9267 | ---    | ---    | ---    |
| 26               | 0.3649                             | 0.4793 | --- | 0.0615 | 6.8595 | ---    | ---    | ---    | ---    |
| 27               | 0.1842                             | 0.5368 | --- | 0.0818 | 4.3314 | ---    | ---    | ---    | ---    |
| 28               | 0.8904                             | 0.3385 | --- | ---    | 4.0088 | ---    | 0.2129 | ---    | ---    |
| 29               | 0.3462                             | 0.3264 | --- | 0.0285 | 0.2247 | 6.6562 | ---    | 0.0253 | ---    |
| 30               | 0.8346                             | 0.3781 | --- | 0.2077 | 3.983  | ---    | ---    | ---    | ---    |
| 31               | 0.3144                             | 0.3974 | --- | 0.4571 | 2.9701 | ---    | ---    | ---    | ---    |
| 32               | ---                                | 0.5376 | --- | 0.7246 | 2.4176 | 0.5749 | ---    | ---    | ---    |
| 33               | 0.2147                             | 0.7113 | --- | 4.0673 | 2.4235 | 0.3924 | ---    | ---    | ---    |
| 34               | 0.2119                             | 0.3334 | --- | 3.3238 | 0.4453 | ---    | ---    | ---    | ---    |
| 35               | 0.1809                             | 0.0861 | --- | 2.6567 | 2.6072 | 0.2175 | ---    | ---    | ---    |
| 36               | 0.7749                             | 0.1896 | --- | ---    | 5.5148 | ---    | ---    | ---    | ---    |
| 37               | 0.3882                             | 0.3448 | --- | 1.2353 | 4.4097 | ---    | ---    | ---    | ---    |
| 38               | 0.6211                             | 0.9268 | --- | 0.0733 | 5.8593 | ---    | ---    | ---    | ---    |
| 39               | 0.25                               | 0.3715 | --- | 2.9078 | 1.9811 | ---    | ---    | 0.0119 | ---    |

|    |        |        |        |        |        |        |        |        |        |
|----|--------|--------|--------|--------|--------|--------|--------|--------|--------|
| 40 | 0.4698 | 0.2428 | ---    | 0.4196 | 3.1258 | ---    | ---    | ---    | 0.2042 |
| 41 | 2.1476 | 0.6429 | ---    | 0.9837 | 4.2496 | ---    | ---    | ---    | ---    |
| 42 | ---    | 0.4002 | ---    | 0.083  | 3.8218 | 0.0467 | ---    | ---    | ---    |
| 43 | 0.2314 | 0.3459 | ---    | 2.6285 | 1.94   | 0.0091 | ---    | ---    | ---    |
| 44 | 0.1996 | 0.1838 | ---    | 0.8566 | 1.7458 | ---    | ---    | ---    | ---    |
| 45 | 0.1454 | 0.1848 | ---    | 0.4423 | 3.6719 | ---    | ---    | ---    | ---    |
| 46 | 0.2877 | 0.3007 | ---    | 0.5087 | 4.0581 | 0.8668 | ---    | ---    | ---    |
| 47 | 0.4994 | 0.3787 | ---    | 4.2473 | 2.9149 | 0.7318 | ---    | ---    | ---    |
| 48 | 1.299  | 0.5611 | ---    | 0.0492 | 4.6778 | 0.6755 | ---    | ---    | ---    |
| 49 | 0.0012 | 0.4581 | ---    | ---    | 6.3254 | ---    | ---    | ---    | ---    |
| 50 | 0.0001 | 0.2603 | ---    | 1.6498 | 2.7133 | 0.007  | ---    | ---    | ---    |
| 51 | 0.9674 | 0.4544 | ---    | 0.1308 | 3.4435 | 0.0457 | ---    | ---    | ---    |
| 52 | 0.1021 | 0.4278 | ---    | 0.3776 | 5.2555 | ---    | ---    | ---    | ---    |
| 53 | ---    | 0.2188 | ---    | 2.7222 | 1.892  | 0.0469 | ---    | ---    | ---    |
| 54 | 0.0899 | 0.3567 | ---    | 1.8461 | 1.2884 | ---    | ---    | 0.3183 | ---    |
| 55 | 0.3632 | 0.7446 | ---    | 1.3787 | 2.8176 | 0.1467 | ---    | ---    | ---    |
| 56 | 0.8083 | 0.3271 | ---    | 0.6983 | 3.9938 | ---    | ---    | ---    | ---    |
| 57 | 0.0019 | 0.5799 | ---    | 0.5516 | 5.0911 | 0.0005 | ---    | ---    | ---    |
| 58 | 1.0327 | 0.7653 | ---    | 0.8868 | 3.1664 | 0.6381 | ---    | ---    | ---    |
| 59 | 0.1893 | 0.5641 | ---    | 5.0691 | ---    | 0.2258 | ---    | 1.1332 |        |
| 60 | 0.2022 | 1.3932 | ---    | ---    | 3.1581 | ---    | ---    | ---    | ---    |
| 61 | 0.2677 | 0.091  | ---    | 2.8059 | 1.1119 | ---    | ---    | ---    | ---    |
| 62 | 0.6888 | 0.1897 | ---    | ---    | 4.5197 | 0.2869 | 1.0011 | ---    | ---    |
| 63 | 0.0256 | 0.4625 | 0.0076 | 2.5253 | 3.7292 | 0.0263 | ---    | 0.0056 | ---    |
| 64 | ---    | 0.3775 | ---    | 4.3573 | 2.7039 | 0.3386 | ---    | ---    | ---    |
| 65 | 0.6711 | 0.0118 | ---    | 1.1034 | 1.3679 | ---    | ---    | ---    | ---    |
| 66 | 0.1149 | 0.3653 | ---    | ---    | 3.0028 | ---    | ---    | ---    | ---    |
| 67 | ---    | 0.1758 | ---    | 0.1643 | 4.6406 | ---    | 3.1888 | ---    | ---    |
| 68 | ---    | 0.4683 | 0.0021 | 4.4441 | 1.4718 | 0.0454 | ---    | ---    | ---    |
| 69 | 0.0181 | 0.3792 | ---    | 1.1912 | 4.2078 | ---    | ---    | 0.0622 | ---    |
| 70 | 0.0443 | 0.502  | ---    | ---    | 5.9203 | ---    | ---    | ---    | ---    |
| 71 | 0.2182 | 0.2241 | 0.0223 | 0.1921 | 2.6925 | ---    | 0.0374 | 0.2461 | ---    |
| 72 | 0.4926 | 0.1698 | ---    | 1.6704 | 0.9455 | ---    | ---    | ---    | ---    |
| 73 | 0.652  | 0.8407 | 0.034  | 1.7651 | 7.338  | ---    | 1.034  | 0.092  | ---    |
| 74 | 0.0102 | 0.0399 | ---    | ---    | 0.1933 | ---    | ---    | ---    | ---    |
| 75 | ---    | 0.1992 | ---    | 1.5756 | ---    | ---    | ---    | ---    | ---    |
| 76 | ---    | 1.6119 | ---    | 0.1135 | 3.1983 | ---    | ---    | ---    | ---    |
| 77 | ---    | 0.1968 | ---    | ---    | 3.4262 | ---    | ---    | 2.6469 | ---    |
| 78 | 0.5022 | 0.485  | ---    | 0.2912 | 0.0236 | ---    | ---    | ---    | ---    |
| 79 | ---    | 0.6641 | 0.0484 | 4.338  | 2.0055 | ---    | ---    | ---    | ---    |
| 80 | 0.1296 | 0.6075 | ---    | 0.6413 | 0.0524 | ---    | ---    | ---    | ---    |
| 81 | 0.2439 | 0.184  | 0.6844 | 1.5628 | 2.5263 | ---    | ---    | ---    | ---    |
| 82 | ---    | 0.1636 | ---    | ---    | 3.8721 | ---    | ---    | ---    | 0.4064 |
| 83 | ---    | 0.4104 | ---    | ---    | 0.1717 | ---    | ---    | ---    | ---    |

|     |        |        |        |        |        |     |        |        |        |
|-----|--------|--------|--------|--------|--------|-----|--------|--------|--------|
| 84  | ---    | 0.0508 | ---    | 0.8778 | ---    | --- | ---    | ---    | ---    |
| 85  | ---    | 0.5612 | ---    | 0.0678 | 2.2741 | --- | ---    | ---    | ---    |
| 86  | ---    | 0.2095 | 0.053  | 2.379  | 1.8424 | --- | 0.1907 | ---    | ---    |
| 87  | 1.4231 | 0.5781 | ---    | 1.5383 | 0.1184 | --- | ---    | ---    | ---    |
| 88  | ---    | 0.6452 | ---    | 0.6005 | 0.7931 | --- | 0.0199 | 0.7019 | ---    |
| 89  | ---    | 0.6964 | ---    | 3.488  | 0.7989 | --- | 0.5746 | ---    | ---    |
| 90  | ---    | 0.1473 | ---    | 0.6494 | ---    | --- | 0.064  | ---    | ---    |
| 91  | ---    | 0.3023 | ---    | 1.0197 | ---    | --- | ---    | ---    | ---    |
| 92  | 1.0556 | 0.5065 | 0.011  | 0.2348 | 5.6192 | --- | ---    | ---    | ---    |
| 93  | ---    | 0.4339 | ---    | 2.0124 | 0.0349 | --- | ---    | ---    | ---    |
| 94  | ---    | 0.3518 | 0.3868 | 3.677  | ---    | --- | 2.8096 | ---    | ---    |
| 95  | ---    | 1.5666 | ---    | 0.2669 | 4.7873 | --- | ---    | ---    | ---    |
| 96  | ---    | 0.2035 | ---    | 1.5909 | 0.0036 | --- | ---    | ---    | ---    |
| 97  | 0.5906 | 0.3475 | ---    | 0.1858 | 5.4761 | --- | 0.312  | ---    | 0.2343 |
| 98  | ---    | 0.6499 | ---    | ---    | 4.5674 | --- | ---    | ---    | ---    |
| 99  | 0.0337 | 0.7847 | ---    | 0.0583 | 3.7677 | --- | ---    | ---    | ---    |
| 100 | ---    | 0.901  | ---    | 2.1039 | 0.3045 | --- | 0.0026 | ---    | ---    |
| 101 | 0.1421 | 0.6806 | ---    | 0.859  | 5.2075 | --- | ---    | ---    | ---    |
| 102 | 0.173  | 0.8974 | 0.0009 | 2.16   | 2.3149 | --- | 0.9187 | ---    | ---    |
| 103 | 0.1023 | 0.4475 | ---    | 2.8475 | 3.2606 | --- |        | ---    | ---    |
| 104 | ---    | 0.3016 | ---    | 4.2301 | 0.7094 | --- | 0.6122 | ---    | ---    |
| 105 | 0.0416 | 0.2316 | 0.3856 | 0.724  | 0.0001 | --- | ---    | ---    | ---    |
| 106 | 0.5381 | 0.5457 | ---    | 1.2209 | 0.4585 | --- | ---    | ---    | ---    |
| 107 | 0.292  | 1.4959 | ---    | 2.0762 | 0.0074 | --- | ---    | ---    | ---    |
| 108 | 0.4165 | 0.5013 | ---    | 6.2722 | 0.9842 | --- | ---    | ---    | ---    |
| 109 | 0.5207 | 0.3812 | 0.2847 | 1.6322 | 0.0002 | --- | ---    | ---    | ---    |
| 110 | 0.961  | 0.7396 | ---    | 3.7359 | 4.0181 | --- | ---    | ---    | ---    |
| 111 | 0.3868 | 0.8522 | 0.0578 | 0.0829 | 3.5939 | --- | ---    | ---    | ---    |
| 112 | ---    | 0.7025 | ---    | 0.021  | 2.0012 | --- | ---    | ---    | ---    |
| 113 | 0.1916 | 0.6104 | ---    | 1.6086 | 2.051  | --- | ---    | ---    | ---    |
| 114 | 0.0841 | 0.6529 | ---    | 0.0477 | 6.3891 | --- | ---    | ---    | ---    |
| 115 | 0.0222 | 0.3132 | 0.068  | 2.3626 | 2.039  | --- | 0.0017 | ---    | ---    |
| 116 | ---    | 0.7393 | ---    | 0.0454 | 0.0533 | --- | ---    | ---    | ---    |
| 117 | 0.7087 | 0.3099 | 0.0009 | 0.8256 | 0.0054 | --- | 0.036  | 0.0075 | ---    |
| 118 | 0.2833 | 0.8499 | 0.0193 | 0.7955 | 3.3569 | --- | ---    | ---    | ---    |
| 119 | 0.7198 | 0.3925 | 0.0335 | 1.3461 | 4.0389 | --- | ---    | ---    | ---    |
| 120 | 0.3624 | 0.4975 | ---    | 0.1175 | 3.7507 | --- | ---    | ---    | 0.0034 |
| 121 | 0.0306 | 0.2806 | ---    | 0.0189 | 2.0734 | --- | ---    | ---    | ---    |
| 122 | 0.6722 | 0.8364 | ---    | 2.7789 | 3.0638 | --- | ---    | ---    | 0.0042 |
| 123 | 0.2787 | 1.3531 | ---    | 5.7496 | 0.8132 | --- | ---    | ---    | 0.1619 |
| 124 | ---    | 0.4262 | ---    | 0.0556 | 0.0017 | --- | 0.0001 | ---    | ---    |
| 125 | 0.2858 | 1.2    | ---    | 0.6978 | 3.4382 | --- | ---    | ---    | 1.0225 |
| 126 | 0.1796 | 0.2559 | 0.76   | 0.2497 | 0.0001 | --- | 0.0355 | 0.0633 | ---    |
| 127 | 0.2441 | 0.6716 | 0.0288 | 1.7591 | 3.3374 | --- | ---    | ---    | ---    |

|     |        |        |        |        |        |        |        |     |        |
|-----|--------|--------|--------|--------|--------|--------|--------|-----|--------|
| 128 | 0.2914 | 0.4928 | ---    | ---    | 2.6147 | ---    | ---    | --- | ---    |
| 129 | 0.7169 | 0.2346 | 0.0766 | 2.884  | 3.4901 | ---    | ---    | --- | ---    |
| 130 | ---    | 1.5721 | ---    | 0.0545 | 4.152  | ---    | ---    | --- | ---    |
| 131 | 0.3588 | 0.9432 | ---    | 0.1945 | 4.4173 | ---    | ---    | --- | ---    |
| 132 | 0.3165 | 2.1298 | 0.1495 | 3.8125 | 2.0308 | ---    | ---    | --- | 0.0324 |
| 133 | 0.1061 | 0.5749 | 0.0105 | 1.6654 | 3.8296 | 0.0472 | ---    | --- | 0.1279 |
| 134 | ---    | 0.3494 | ---    | 1.916  | 0.054  | ---    | ---    | --- | ---    |
| 135 | 0.3948 | 0.572  | 0.9334 | ---    | 2.9646 | ---    | ---    | --- | ---    |
| 136 | 0.1079 | 0.7005 | ---    | 0.2167 | 4.2042 | ---    | 0.0972 | --- | 0.3983 |
| 137 | 0.8913 | 0.4444 | 0.0105 | 1.0129 | 3.1783 | ---    | ---    | --- | ---    |
| 138 | 0.1526 | 1.2095 | 0.0078 | 0.2259 | 2.5689 | ---    | ---    | --- | ---    |
| 139 | 0.2925 | 0.8207 | 0.0313 | 1.6026 | 5.7595 | 0.0094 | ---    | --- | ---    |
| 140 | ---    | 0.1527 | 0.0036 | 0.0163 | 3.1987 | ---    | 0.0038 | --- | ---    |
| 141 | 0.6688 | 0.2799 | ---    | 4.2181 | 0.2718 | ---    | ---    | --- | ---    |
| 142 | 1.142  | 0.3988 | 0.0267 | 0.533  | 4.1008 | ---    | ---    | --- | ---    |
| 143 | 0.9349 | 0.0663 | 2.6144 | ---    | 3.7306 | ---    | 0.1123 | --- | 0.1449 |
| 144 | 0.8368 | 0.2754 | 0.021  | 1.108  | 2.2948 | 0.0607 | ---    | --- | ---    |
| 145 | 0.146  | 1.1707 | ---    | 2.2605 | 2.7179 | 0.0554 | ---    | --- | 0.0056 |
| 146 | 0.3804 | 0.7137 | ---    | 0.6168 | 2.7319 | 0.0118 | 0.8655 | --- | 0.0232 |
| 147 | 0.5205 | 0.4695 | 0.0287 | 1.4744 | 4.1656 | ---    | ---    | --- | ---    |
| 148 | 0.3901 | 0.3226 | 0.0261 | 1.5543 | 3.2386 | ---    | ---    | --- | 0.0274 |
| 149 | 0.7761 | 0.3533 | 0.0462 | 1.9442 | 1.4413 | 0.0845 | ---    | --- | ---    |
| 150 | 0.3651 | 1.3445 | ---    | 1.3862 | 3.7919 | 0.0242 | ---    | --- | ---    |
| 151 | 0.2909 | 0.9796 | ---    | 0.2127 | 6.1222 | 0.0227 | ---    | --- | 0.0015 |
| 152 | 0.4938 | 2.7426 | 0.0141 | 0.7825 | 2.782  | ---    | ---    | --- | ---    |
| 153 | 0.3865 | 1.232  | ---    | 0.5259 | 2.7856 | ---    | 0.0061 | --- | ---    |
| 154 | 0.1773 | 0.6641 | 0.0349 | ---    | 2.6133 | ---    | ---    | --- | ---    |
| 155 | 0.3225 | 1.5333 | ---    | 0.9443 | 2.1437 | 0.1443 | ---    | --- | 0.0018 |
| 156 | 0.4912 | 0.7418 | 0.0009 | ---    | 5.9469 | ---    | 0.4637 | --- | ---    |
| 157 | 0.6643 | 0.4357 | 0.1556 | ---    | 5.1893 | ---    | ---    | --- | 0.3433 |
| 158 | 0.7558 | 1.793  | 0.027  | 0.6856 | 7.2225 | ---    | ---    | --- | ---    |
| 159 | 0.0075 | 0.7317 | 0.0422 | 0.0711 | 4.3594 | ---    | ---    | --- | ---    |
| 160 | ---    | 0.708  | ---    | 0.0325 | 4.253  | ---    | ---    | --- | ---    |
| 161 | ---    | 0.3661 | 0.1835 | ---    | 4.12   | ---    | ---    | --- | ---    |
| 162 | ---    | 0.5037 | ---    | ---    | 7.4318 | ---    | 0.0403 | --- | ---    |
| 163 | ---    | 0.5509 | ---    | ---    | 4.5081 | ---    | 0.1186 | --- | ---    |

Where, BUL- Build Up Land ; WB-Water Body; WL-Wet Land; Pl-Plantation;CL-Crop Land; FL-Fallow Land; LWOS-Land Without Scrub; LWS-Land With Scrub; WAL-Waste land

**Table S2 Spatial distribution of HSG categories in each watershed.**

| Watershed | Hydrological Soil Group area in sq.km |         |         |         | Watershed | Hydrological Soil Group area in sq.km |         |         |         |
|-----------|---------------------------------------|---------|---------|---------|-----------|---------------------------------------|---------|---------|---------|
| Number    | Group A                               | Group B | Group C | Group D | Number    | Group A                               | Group B | Group C | Group D |
| 1         | ---                                   | ---     | 6.5419  | 0.741   | 39        | ---                                   | ---     | 4.6097  | 0.9126  |
| 2         | ---                                   | ---     | 7.7638  | 0.2156  | 40        | ---                                   | ---     | 3.7219  | 0.7404  |
| 3         | ---                                   | ---     | 5.7481  | 0.623   | 41        | ---                                   | ---     | 6.5832  | 1.4407  |
| 4         | 2.0647                                | ---     | 2.5229  | 0.3875  | 42        | ---                                   | ---     | 3.9554  | 0.3963  |
| 5         | ---                                   | ---     | 3.1912  | 0.5546  | 43        | 0.0858                                | ---     | 4.4453  | 0.6238  |
| 6         | 1.7967                                | ---     | 6.4856  | 1.0685  | 44        | ---                                   | ---     | 2.6571  | 0.3288  |
| 7         | ---                                   | ---     | 6.4209  | ---     | 45        | ---                                   | ---     | 4.161   | 0.2835  |
| 8         | 2.0089                                | 0.0633  | 4.2485  | 0.3563  | 46        | ---                                   | ---     | 5.3042  | 0.7178  |
| 9         | ---                                   | ---     | 4.426   | 0.025   | 47        | 0.1066                                | ---     | 8.0871  | 0.5784  |
| 10        | ---                                   | ---     | 3.2814  | 0.4397  | 48        | ---                                   | ---     | 5.9066  | 1.3561  |
| 11        | 0.0038                                | ---     | 4.9839  | 0.433   | 49        | ---                                   | ---     | 6.3708  | 0.4138  |
| 12        | 0.3695                                | 1.78    | 3.5403  | 0.1042  | 50        | 0.1556                                | ---     | 4.2592  | 0.2156  |
| 13        | ---                                   | ---     | 8.2644  | 0.1551  | 51        | ---                                   | ---     | 4.4996  | 0.5222  |
| 14        | ---                                   | ---     | 2.7351  | ---     | 52        | ---                                   | ---     | 5.1785  | 0.9846  |
| 15        | ---                                   | ---     | 2.681   | 0.175   | 53        | ---                                   | ---     | 4.6599  | 0.22    |
| 16        | ---                                   | ---     | 2.3747  | ---     | 54        | ---                                   | ---     | 3.4644  | 0.435   |
| 17        | ---                                   | ---     | 3.1421  | 0.2687  | 55        | 0.4363                                | ---     | 3.8343  | 1.1843  |
| 18        | ---                                   | ---     | 2.7373  | 0.3012  | 56        | ---                                   | ---     | 4.8115  | 1.016   |
| 19        | ---                                   | ---     | 4.6312  | 0.7225  | 57        | ---                                   | ---     | 5.7309  | 0.4941  |
| 20        | ---                                   | ---     | 5.5526  | 1.2363  | 58        | ---                                   | ---     | 5.523   | 0.9662  |
| 21        | ---                                   | ---     | 3.6095  | 1.641   | 59        | ---                                   | ---     | 6.6783  | 0.5033  |
| 22        | ---                                   | ---     | 8.0294  | 0.5684  | 60        | ---                                   | ---     | 3.1793  | 1.5742  |
| 23        | ---                                   | ---     | 3.6487  | 0.1905  | 61        | 0.0001                                | ---     | 4.0843  | 0.1922  |
| 24        | ---                                   | ---     | 7.4372  | 0.5358  | 62        | ---                                   | ---     | 6.2406  | 0.4456  |
| 25        | ---                                   | ---     | 3.707   | 0.1897  | 63        | 0.0518                                |         | 5.9388  | 0.7915  |
| 26        | ---                                   | ---     | 7.0655  | 0.6998  | 64        | ---                                   | 1.7132  | 5.7458  | 0.3184  |
| 27        | ---                                   | ---     | 3.7614  | 1.3728  | 65        | ---                                   | ---     | 5.0574  | 0.7743  |
| 28        | ---                                   | ---     | 3.5499  | 1.9007  | 66        | ---                                   | ---     | 3.0173  | 0.4657  |
| 29        | ---                                   | ---     | 6.9259  | 0.6815  | 67        | ---                                   | ---     | 7.5807  | 0.5888  |
| 30        | ---                                   | ---     | 4.4611  | 0.9423  | 68        | 0.3651                                | 2.8728  | 3.6146  | 0.4574  |
| 31        | ---                                   | ---     | 3.2139  | 0.9221  | 69        | ---                                   | ---     | 5.4777  | 0.3809  |
| 32        | ---                                   | ---     | 3.8011  | 0.4536  | 70        | ---                                   | ---     | 5.7158  | 0.7508  |
| 33        | ---                                   | ---     | 6.8483  | 0.9608  | 71        | ---                                   | ---     | 3.8544  | 0.3435  |
| 34        | ---                                   | ---     | 3.8554  | 0.459   | 72        | ---                                   | ---     | 2.4776  | 0.8005  |
| 35        | ---                                   | ---     | 5.6838  | 0.0647  | 73        | ---                                   | ---     | 10.1447 | 1.6214  |
| 36        | ---                                   | ---     | 6.2182  | 0.2611  | 74        | ---                                   | ---     | 2.1406  | 0.2765  |
| 37        | ---                                   | ---     | 5.6928  | 0.6853  | 75        | 0.2953                                | 0.8042  | 2.1894  | 0.2276  |
| 38        | ---                                   | ---     | 5.9923  | 1.4881  | 76        | 1.5274                                | 0.0179  | 3.3329  | 0.3063  |
| 77        | ---                                   | ---     | 6.5157  | 0.0099  | 135       | 0.0139                                | ---     | 3.0877  | 1.9492  |
| 78        | ---                                   | ---     | 4.8784  | 1.1139  | 136       | ---                                   | 0.1945  | 5.4273  | 0.103   |
| 79        | 0.2884                                | 3.1869  | 3.6495  | 0.6622  | 137       | ---                                   | ---     | 4.5841  | 0.9532  |
| 80        | ---                                   | ---     | 1.7773  | 0.6437  | 138       | ---                                   | ---     | 2.7478  | 1.417   |

|     |        |        |        |        |     |        |        |        |        |
|-----|--------|--------|--------|--------|-----|--------|--------|--------|--------|
| 81  | 1.6964 | ---    | 3.3    | 0.2856 | 139 | ---    | 0.0085 | 7.9203 | 0.5872 |
| 82  | ---    | ---    | 4.5819 | 0.0935 | 140 | 0.1574 | ---    | 2.8391 | 0.3786 |
| 83  | ---    | ---    | 3.879  | 0.5598 | 141 | ---    | ---    | 4.2985 | 1.1401 |
| 84  | 0.6926 | 0.4915 | 1.0547 | 0.0492 | 142 | ---    | ---    | 5.4379 | 0.7634 |
| 85  | ---    | ---    | 3.2849 | 0.2606 | 143 | 2.8504 | ---    | 3.4947 | 0.9094 |
| 86  | ---    | ---    | 4.4492 | 0.2254 | 144 | ---    | 0.1148 | 4.3095 | 0.1726 |
| 87  | ---    | ---    | 5.1995 | 1.4762 | 145 | ---    | 0.9922 | 3.7603 | 1.6037 |
| 88  | ---    | ---    | 6.8304 | 0.726  | 146 | ---    | 2.3431 | 1.9526 | 1.0475 |
| 89  | ---    | ---    | 7.0145 | 2.0379 | 147 | ---    | ---    | 6.475  | 0.1837 |
| 90  | 0.224  | 0.3274 | 1.5808 | 0.0853 | 148 | ---    | ---    | 5.3752 | 0.184  |
| 91  | ---    | ---    | 2.4733 | 0.2312 | 149 | ---    | 0.3177 | 4.1918 | 0.1361 |
| 92  | ---    | ---    | 6.965  | 1.5364 | 150 | ---    | 1.0257 | 4.3158 | 1.5703 |
| 93  | 0.7998 | 1.1536 | 1.4743 | 0.4338 | 151 | ---    | 0.3432 | 6.268  | 1.0184 |
| 94  | 0.6175 | 2.6816 | 4.1347 | 0.4028 | 152 | ---    | ---    | 4.1786 | 2.6375 |
| 95  | ---    | ---    | 5.3332 | 1.7205 | 153 | 0.0747 | 0.0783 | 2.752  | 2.031  |
| 96  | 1.4901 | ---    | 1.5734 | 0.1901 | 154 | ---    | ---    | 2.7231 | 0.7666 |
| 97  | ---    | ---    | 7.0665 | 0.0797 | 155 | ---    | 0.2114 | 3.2667 | 1.6118 |
| 98  | ---    | ---    | 4.8186 | 0.3987 | 156 | ---    | ---    | 7.2116 | 0.4329 |
| 99  | ---    | ---    | 4.4062 | 0.3641 | 157 | 0.7126 | ---    | 5.8883 | 0.1874 |
| 100 | 1.7817 | ---    | 2.4257 | 0.2123 | 158 | ---    | ---    | 8.5958 | 1.8882 |
| 101 | ---    | ---    | 6.8669 | 0.223  | 159 | ---    | ---    | 3.473  | 1.7389 |
| 102 | ---    | ---    | 5.8597 | 0.6054 | 160 | ---    | ---    | 4.2529 | 0.7406 |
| 103 | ---    | ---    | 5.5059 | 1.1521 | 161 | 0.8443 | ---    | 3.6363 | 0.189  |
| 104 | ---    | ---    | 5.3624 | 0.491  | 162 | ---    | ---    | 6.3754 | 1.6005 |
| 105 | 0.5872 | 0.1067 | 2.3965 | 0.3546 | 163 | ---    | ---    | 3.969  | 0.7587 |
| 106 | 0.7061 | ---    | 4.0006 | 0.5344 |     |        |        |        |        |
| 107 | 1.0459 | 0.8262 | 3.7477 | 1.7714 |     |        |        |        |        |
| 108 | ---    | ---    | 6.9166 | 1.2577 |     |        |        |        |        |
| 109 | 0.7261 | ---    | 4.3644 | 1.7757 |     |        |        |        |        |
| 110 | ---    | ---    | 8.3852 | 1.0694 |     |        |        |        |        |
| 111 | ---    | ---    | 4.1353 | 0.8383 |     |        |        |        |        |
| 112 | ---    | ---    | 3.1316 | 0.002  |     |        |        |        |        |
| 113 | ---    | ---    | 3.8781 | 0.5834 |     |        |        |        |        |
| 114 | ---    | ---    | 6.5129 | 0.6608 |     |        |        |        |        |
| 115 | ---    | ---    | 4.5965 | 0.2103 |     |        |        |        |        |
| 116 | 0.0139 | ---    | 1.0743 | 0.7934 |     |        |        |        |        |
| 117 | ---    | 0.6667 | 6.0026 | 0.676  |     |        |        |        |        |
| 118 | ---    | ---    | 4.4443 | 0.8646 |     |        |        |        |        |
| 119 | ---    | ---    | 5.6256 | 0.9052 |     |        |        |        |        |
| 120 | ---    | ---    | 3.9871 | 0.7445 |     |        |        |        |        |
| 121 | ---    | ---    | 2.1781 | 0.2254 |     |        |        |        |        |
| 122 | ---    | ---    | 6.026  | 1.3295 |     |        |        |        |        |
| 123 | ---    | ---    | 5.7053 | 2.6512 |     |        |        |        |        |
| 124 | ---    | ---    | 2.4783 | 0.3827 |     |        |        |        |        |
| 125 | ---    | ---    | 5.3649 | 1.2794 |     |        |        |        |        |
| 126 | ---    | 1.984  | 2.0192 | 1.1647 |     |        |        |        |        |

|     |     |     |        |        |  |  |  |  |  |
|-----|-----|-----|--------|--------|--|--|--|--|--|
| 127 | --- | --- | 5.4147 | 0.6262 |  |  |  |  |  |
| 128 | --- | --- | 3.1614 | 0.2375 |  |  |  |  |  |
| 129 | --- | --- | 6.4802 | 0.9221 |  |  |  |  |  |
| 130 | --- | --- | 5.5243 | 0.4688 |  |  |  |  |  |
| 131 | --- | --- | 5.4362 | 0.4777 |  |  |  |  |  |
| 132 | --- | --- | 6.3517 | 2.1197 |  |  |  |  |  |
| 133 | --- | --- | 5.9167 | 0.4449 |  |  |  |  |  |
| 134 | --- | --- | 1.8606 | 0.4587 |  |  |  |  |  |

**Table S3 Shows the correlation between the runoff volume in each season, annual runoff volume, and the storage capacity of tanks in each sub-watershed.**

| Subwatershed Number | Tank ID | Runoff volume (mcm) |               |            |            |        | Tank Storage Capacity (mcm) |
|---------------------|---------|---------------------|---------------|------------|------------|--------|-----------------------------|
|                     |         | Winter season       | Summer season | SW monsoon | NE monsoon | Annual |                             |
| 1                   | 1       | 0.0197              | 0.0819        | 0.15       | 2.6378     | 2.8893 | 0.1386                      |
| 2                   | 2       | 0.0162              | 0.3469        | 0.1387     | 3.2827     | 3.7845 | 0.0151                      |
| 3                   | 3       | 0.0262              | 0.3338        | 0.0808     | 2.7617     | 3.2024 | 0.0709                      |
| 4                   | ---     | 0.0035              | 0.1796        | 0.1185     | 1.9822     | 2.2838 | ---                         |
| 5                   | 4       | 0.0087              | 0.1666        | 0.0607     | 1.535      | 1.7709 | 0.2164                      |
| 6                   | 5,6     | 0.0112              | 0.1328        | 0.5131     | 3.0235     | 3.6806 | 0.1963                      |
| 7                   | ---     | 0.0044              | 0.2255        | 0.1487     | 2.4889     | 2.8676 | ---                         |
| 8                   | 7,8     | 0.0042              | 0.2509        | 0.1759     | 2.8256     | 3.2567 | 0.2839                      |
| 9                   | ---     | 0.0063              | 0.1784        | 0.0865     | 1.7873     | 2.0586 | ---                         |
| 10                  | 9       | 0.0125              | 0.1814        | 0.051      | 1.559      | 1.8039 | 0.1008                      |
| 11                  | 10      | 0.014               | 0.2473        | 0.084      | 2.235      | 2.5802 | 0.1295                      |
| 12                  | ---     | 0.0023              | 0.1907        | 0.1501     | 2.2335     | 2.5766 | ---                         |
| 13                  | ---     | 0.0971              | 0.2823        | 0.2127     | 2.4077     | 2.9997 | ---                         |
| 14                  | ---     | 0.0006              | 0.0836        | 0.0754     | 1.027      | 1.1867 | ---                         |
| 15                  | 11      | 0.0082              | 0.0474        | 0.1538     | 0.6985     | 0.9079 | 0.1172                      |
| 16                  | 13      | 0.0048              | 0.0336        | 0.1357     | 0.5478     | 0.722  | 0.6069                      |
| 17                  | ---     | 0.0073              | 0.1488        | 0.057      | 1.3913     | 1.6045 | ---                         |
| 18                  | 12      | 0.0048              | 0.1239        | 0.0567     | 1.2197     | 1.4051 | 0.0949                      |
| 19                  | ---     | 0.0173              | 0.2583        | 0.0748     | 2.2374     | 2.5878 | ---                         |
| 20                  | 14,15   | 0.0478              | 0.1706        | 0.232      | 1.7727     | 2.2232 | 0.1605                      |
| 21                  | 16      | 0.0338              | 0.3103        | 0.0473     | 2.305      | 2.6963 | 0.115                       |
| 22                  | 17      | 0.019               | 0.3408        | 0.3502     | 3.0195     | 3.7296 | 0.3196                      |

|    |          |        |        |        |        |        |        |
|----|----------|--------|--------|--------|--------|--------|--------|
| 23 | ---      | 0.0217 | 0.0858 | 0.1473 | 0.9725 | 1.2274 | ---    |
| 24 | 18       | 0.0034 | 0.2617 | 0.2017 | 3.0425 | 3.5093 | 0.1215 |
| 25 | 19       | 0.0005 | 0.1145 | 0.1125 | 1.4499 | 1.6775 | 0.1086 |
| 26 | ---      | 0.0262 | 0.3793 | 0.106  | 3.2548 | 3.7662 | ---    |
| 27 | 20,21    | 0.0209 | 0.2643 | 0.0631 | 2.1794 | 2.5277 | 0.1948 |
| 28 | ---      | 0.0242 | 0.2875 | 0.0637 | 2.3276 | 2.703  | ---    |
| 29 | ---      | 0.0299 | 0.1418 | 0.3424 | 1.8405 | 2.3545 | ---    |
| 30 | ---      | 0.0239 | 0.2846 | 0.0633 | 2.3066 | 2.6785 | ---    |
| 31 | 22       | 0.0251 | 0.096  | 0.1531 | 1.0578 | 1.3321 | 0.1506 |
| 32 | 23,24,25 | 0.0231 | 0.2179 | 0.1197 | 1.5966 | 1.9574 | 0.2589 |
| 33 | 26,27,28 | 0.0323 | 0.3666 | 0.2504 | 2.8588 | 3.5082 | 0.398  |
| 34 | ---      | 0.0009 | 0.1314 | 0.1195 | 1.6185 | 1.8703 | ---    |
| 35 | ---      | 0.0099 | 0.2159 | 0.2537 | 2.001  | 2.4805 | ---    |
| 36 | ---      | 0.0005 | 0.182  | 0.1967 | 2.3868 | 2.7659 | ---    |
| 37 | ---      | 0.014  | 0.2795 | 0.1059 | 2.6045 | 3.0038 | ---    |
| 38 | 29,30    | 0.0371 | 0.4077 | 0.0814 | 3.2198 | 3.7461 | 0.7189 |
| 39 | 31       | 0.0242 | 0.1085 | 0.2378 | 1.3539 | 1.7244 | 0.0986 |
| 40 | 32       | 0.0134 | 0.2114 | 0.0647 | 1.8582 | 2.1478 | 0.0298 |
| 41 | 33,34,35 | 0.0846 | 0.2532 | 0.2104 | 2.2269 | 2.7751 | 0.2473 |
| 42 | 36,37    | 0.0147 | 0.192  | 0.1516 | 1.5638 | 1.922  | 0.2338 |
| 43 | 38       | 0.0158 | 0.2231 | 0.1888 | 1.8568 | 2.2845 | 0.0887 |
| 44 | 39       | 0.0078 | 0.1255 | 0.1188 | 1.0822 | 1.3343 | 0.0597 |
| 45 | ---      | 0.0104 | 0.1977 | 0.0719 | 1.8214 | 2.1014 | ---    |
| 46 | ---      | 0.032  | 0.3351 | 0.0625 | 2.6053 | 3.0349 | ---    |
| 47 | 40       | 0.0467 | 0.449  | 0.2527 | 3.3117 | 4.0602 | 0.0963 |
| 48 | 41       | 0.0092 | 0.2832 | 0.1451 | 2.8849 | 3.3225 | 0.3798 |
| 49 | 42       | 0      | 0.168  | 0.2346 | 2.4308 | 2.8333 | 0.3771 |
| 50 | ---      | 0.0113 | 0.1868 | 0.1805 | 1.6222 | 2.0009 | ---    |
| 51 | ---      | 0.0241 | 0.2737 | 0.0572 | 2.1851 | 2.5401 | ---    |
| 52 | 44,45    | 0.0206 | 0.271  | 0.2156 | 2.2127 | 2.7199 | 0.301  |
| 53 | 46       | 0.011  | 0.1926 | 0.1953 | 1.6991 | 2.098  | 0.1638 |
| 54 | 47,48    | 0.015  | 0.1789 | 0.1289 | 1.4171 | 1.7398 | 0.1838 |
| 55 | 49,50    | 0.0582 | 0.3585 | 0.099  | 2.2089 | 2.7246 | 0.2242 |
| 56 | 51       | 0.0018 | 0.1842 | 0.1544 | 2.2048 | 2.5452 | 0.1162 |
| 57 | 52       | 0.0207 | 0.2736 | 0.2179 | 2.2346 | 2.7468 | 0.3135 |
| 58 | 53,54    | 0.0567 | 0.394  | 0.1365 | 2.5604 | 3.1477 | 0.3124 |
| 59 | 55,56    | 0.0003 | 0.1979 | 0.2225 | 2.6343 | 3.0551 | 0.314  |
| 60 | 57       | 0.0557 | 0.3238 | 0.0791 | 1.9412 | 2.3997 | 1.4708 |
| 61 | ---      | 0.0112 | 0.1756 | 0.1632 | 1.5057 | 1.8556 | ---    |
| 62 | ---      | 0.0411 | 0.2655 | 0.0737 | 2.1034 | 2.4838 | ---    |

|     |          |        |        |        |        |        |        |
|-----|----------|--------|--------|--------|--------|--------|--------|
| 63  | 43       | 0.0186 | 0.2824 | 0.2544 | 2.3974 | 2.9528 | 0.1462 |
| 64  | 58,59    | 0.0198 | 0.3171 | 0.2993 | 2.733  | 3.3692 | 0.1939 |
| 65  | ---      | 0.0291 | 0.2904 | 0.1713 | 2.1705 | 2.6613 | ---    |
| 66  | 60       | 0.0005 | 0.1028 | 0.1    | 1.2975 | 1.5008 | 0.1358 |
| 67  | ---      | 0.0091 | 0.1907 | 0.1955 | 2.2613 | 2.6566 | ---    |
| 68  | 61,62    | 0.03   | 0.3419 | 0.2352 | 2.6714 | 3.2784 | 0.3911 |
| 69  | 63       | 0.0106 | 0.2458 | 0.1045 | 2.3678 | 2.7287 | 0.0772 |
| 70  | ---      | 0.0006 | 0.011  | 0.2936 | 1.8242 | 2.1294 | ---    |
| 71  | ---      | 0.0082 | 0.1791 | 0.0728 | 1.7035 | 1.9636 | ---    |
| 72  | ---      | 0.0172 | 0.1658 | 0.094  | 1.2257 | 1.5027 | ---    |
| 73  | 64       | 0.0344 | 0.3572 | 0.1998 | 3.4529 | 4.0442 | 0.4435 |
| 74  | ---      | 0.0083 | 0.1072 | 0.0836 | 0.8699 | 1.069  | ---    |
| 75  | ---      | 0.0004 | 0.0888 | 0.2176 | 1.085  | 1.3918 | ---    |
| 76  | 65       | 0.0903 | 0.4174 | 0.057  | 2.2287 | 2.7933 | 0.0649 |
| 77  | ---      | 0.0036 | 0.2222 | 0.1575 | 2.5113 | 2.8946 | ---    |
| 78  | 66       | 0.0284 | 0.2935 | 0.1804 | 2.2194 | 2.7217 | 0.1101 |
| 79  | 67,68    | 0.0173 | 0.3066 | 0.3125 | 2.7095 | 3.346  | 0.4312 |
| 80  | 69       | 0.0252 | 0.1573 | 0.0445 | 0.9748 | 1.2019 | 0.6449 |
| 81  | 70       | 0.053  | 0.3385 | 0.1005 | 2.1209 | 2.6129 | 0.0479 |
| 82  | ---      | 0.0089 | 0.1983 | 0.082  | 1.8944 | 2.1835 | ---    |
| 83  | 178      | 0.016  | 0.1996 | 0.1508 | 1.6039 | 1.9702 | 0.1386 |
| 84  | ---      | 0.0029 | 0.0792 | 0.106  | 0.7681 | 0.9562 | ---    |
| 85  | 179      | 0.0451 | 0.2498 | 0.0546 | 1.4627 | 1.8123 | 0.1597 |
| 86  | ---      | 0.0035 | 0.0995 | 0.1211 | 1.2571 | 1.4811 | ---    |
| 87  | 72,73    | 0.0673 | 0.4284 | 0.126  | 2.6779 | 3.2996 | 0.4714 |
| 88  | 74,75    | 0.0024 | 0.0189 | 0.3068 | 2.1957 | 2.5238 | 0.4218 |
| 89  | 76,77,78 | 0.0019 | 0.0197 | 0.3841 | 2.6006 | 3.0062 | 0.5686 |
| 90  | ---      | 0      | 0.0473 | 0.1559 | 0.6555 | 0.8586 | ---    |
| 91  | 79,80    | 0.0103 | 0.1238 | 0.0896 | 0.9823 | 1.2061 | 0.1131 |
| 92  | 81       | 0.1166 | 0.6177 | 0.1218 | 3.5399 | 4.3959 | 0.1382 |
| 93  | 82,83    | 0.0005 | 0.0986 | 0.2368 | 1.1949 | 1.5308 | 0.3662 |
| 94  | 84       | 0.0014 | 0.1358 | 0.6304 | 2.2034 | 2.971  | 0.1449 |
| 95  | 85       | 0.1178 | 0.5572 | 0.0814 | 3.0122 | 3.7685 | 1.5794 |
| 96  | 86       | 0.0038 | 0.038  | 0.3224 | 0.838  | 1.2021 | 0.015  |
| 97  | ---      | 0.0212 | 0.3372 | 0.1041 | 2.9706 | 3.433  | ---    |
| 98  | 87       | 0.0269 | 0.0582 | 0.0929 | 1.7808 | 1.9588 | 0.1932 |
| 99  | 88,89    | 0.0276 | 0.0577 | 0.0787 | 1.646  | 1.8101 | 0.1949 |
| 100 | 90       | 0.0332 | 0.2537 | 0.103  | 1.7151 | 2.105  | 0.6968 |
| 101 | 71       | 0.0828 | 0.4822 | 0.1183 | 2.8942 | 3.5775 | 0.2144 |
| 102 | 91,92,93 | 0.0155 | 0.0438 | 0.1669 | 2.0743 | 2.3006 | 0.3086 |

|     |                 |        |        |        |        |        |        |
|-----|-----------------|--------|--------|--------|--------|--------|--------|
| 103 | 94              | 0.0367 | 0.0778 | 0.1135 | 2.2868 | 2.5148 | 0.0542 |
| 104 | ---             | 0.0009 | 0.0985 | 0.19   | 1.4968 | 1.7862 | ---    |
| 105 | ---             | 0.009  | 0.1414 | 0.1316 | 1.2127 | 1.4947 | ---    |
| 106 | 95,96           | 0.0346 | 0.2871 | 0.1324 | 2.006  | 2.4601 | 0.3157 |
| 107 | 97,98,99        | 0.0572 | 0.4288 | 0.1691 | 2.8772 | 3.5323 | 1.381  |
| 108 | 100             | 0.0025 | 0.1493 | 0.2475 | 2.1306 | 2.5299 | 0.2131 |
| 109 | 101             | 0.0318 | 0.3338 | 0.209  | 2.5378 | 3.1125 | 0.0861 |
| 110 | 102,103         | 0.0296 | 0.459  | 0.1352 | 4.4874 | 5.1113 | 0.3152 |
| 111 | 104,105         | 0.0366 | 0.0714 | 0.0688 | 1.7568 | 1.9337 | 0.7869 |
| 112 | 180             | 0.0506 | 0.2441 | 0.0376 | 1.3325 | 1.6648 | 0.5463 |
| 113 | 106,107         | 0.0277 | 0.2643 | 0.0427 | 2.2163 | 2.551  | 0.2285 |
| 114 | 108,109         | 0.0324 | 0.0732 | 0.138  | 2.4202 | 2.6637 | 0.5294 |
| 115 | 110,113         | 0.0321 | 0.2645 | 0.1205 | 1.8421 | 2.2592 | 0.438  |
| 116 | ---             | 0.0279 | 0.1413 | 0.0248 | 0.7913 | 0.9854 | ---    |
| 117 | 111             | 0.0278 | 0.3352 | 0.2444 | 2.6656 | 3.273  | 0.0651 |
| 118 | ---             | 0.0281 | 0.0604 | 0.0928 | 1.8168 | 1.9981 | ---    |
| 119 | 112             | 0.023  | 0.0563 | 0.1432 | 2.157  | 2.3796 | 0.2455 |
| 120 | 114,115         | 0.0266 | 0.056  | 0.0797 | 1.6279 | 1.7902 | 0.3179 |
| 121 | ---             | 0.0344 | 0.1778 | 0.033  | 1.0062 | 1.2513 | ---    |
| 122 | 116             | 0.0473 | 0.441  | 0.0685 | 3.664  | 4.2209 | 0.1892 |
| 123 | 118             | 0.0122 | 0.2084 | 0.1855 | 2.3497 | 2.7558 | 0.6631 |
| 124 | 119             | 0.0141 | 0.1418 | 0.0846 | 1.0634 | 1.3039 | 0.1845 |
| 125 | 120,121         | 0.0355 | 0.076  | 0.1156 | 2.2755 | 2.5026 | 0.6748 |
| 126 | 122             | 0.0279 | 0.2648 | 0.1467 | 1.9443 | 2.3836 | 0.0207 |
| 127 | 123,124         | 0.0651 | 0.3978 | 0.1081 | 2.442  | 3.0129 | 0.25   |
| 128 | ---             | 0.0582 | 0.2714 | 0.038  | 1.4563 | 1.8239 | ---    |
| 129 | ---             | 0.0289 | 0.0684 | 0.1541 | 2.4662 | 2.7176 | ---    |
| 130 | 181             | 0.1157 | 0.5044 | 0.0574 | 2.609  | 3.2866 | 0.2036 |
| 131 | 125,132         | 0.0167 | 0.0443 | 0.1432 | 1.92   | 2.1242 | 0.4797 |
| 132 | 126,127,128,129 | 0.0518 | 0.4997 | 0.0819 | 4.204  | 4.8374 | 1.0408 |
| 133 | ---             | 0.0201 | 0.0513 | 0.1466 | 2.0836 | 2.3016 | ---    |
| 134 | ---             | 0.0023 | 0.0879 | 0.0488 | 1.0417 | 1.1808 | ---    |
| 135 | ---             | 0.1035 | 0.4368 | 0.0446 | 2.2186 | 2.8035 | ---    |
| 136 | 160             | 0.0309 | 0.3246 | 0.0604 | 2.8151 | 3.231  | 0.0832 |
| 137 | 130,159         | 0.0744 | 0.3989 | 0.081  | 2.2997 | 2.8539 | 0.6431 |
| 138 | 131             | 0.0911 | 0.3705 | 0.0333 | 1.8438 | 2.3386 | 1.4856 |
| 139 | 133             | 0.0298 | 0.0731 | 0.1874 | 2.8111 | 3.1014 | 0.1278 |
| 140 | 134             | 0.0391 | 0.2288 | 0.0567 | 1.3763 | 1.7009 | 0.0546 |
| 141 | 135             | 0.0056 | 0.2071 | 0.1141 | 2.4467 | 2.7734 | 0.0644 |
| 142 | 136             | 0.092  | 0.4657 | 0.0818 | 2.6081 | 3.2476 | 0.0512 |

|     |                 |        |        |        |        |        |        |
|-----|-----------------|--------|--------|--------|--------|--------|--------|
| 143 | ---             | 0.0399 | 0.3883 | 0.2225 | 2.8784 | 3.529  | ---    |
| 144 | 137             | 0.0176 | 0.0419 | 0.0968 | 1.5286 | 1.6848 | 0.1064 |
| 145 | 138,140         | 0.0343 | 0.3605 | 0.067  | 3.126  | 3.5878 | 0.7537 |
| 146 | 139,141,161     | 0.0314 | 0.3113 | 0.0531 | 2.644  | 3.0399 | 0.8161 |
| 147 | 142,143         | 0.0216 | 0.0545 | 0.1516 | 2.1852 | 2.413  | 0.1958 |
| 148 | 144             | 0.0143 | 0.0393 | 0.1399 | 1.7923 | 1.9857 | 0.103  |
| 149 | 145,146         | 0.0126 | 0.0339 | 0.1143 | 1.5038 | 1.6647 | 0.1226 |
| 150 | 147,148,149,150 | 0.0378 | 0.0803 | 0.1185 | 2.372  | 2.6086 | 0.6392 |
| 151 | 151,152,153,154 | 0.048  | 0.4542 | 0.0722 | 3.7942 | 4.3687 | 0.7006 |
| 152 | 155             | 0.0488 | 0.3048 | 0.0502 | 2.5623 | 2.9661 | 3.1157 |
| 153 | 156,157,158     | 0.05   | 0.3469 | 0.0311 | 2.5624 | 2.9904 | 1.049  |
| 154 | ---             | 0.0646 | 0.2883 | 0.0354 | 1.5105 | 1.8987 | ---    |
| 155 | 162,163,164     | 0.0524 | 0.3584 | 0.0311 | 2.6315 | 3.0735 | 0.8504 |
| 156 | 165             | 0.0131 | 0.215  | 0.1342 | 2.601  | 2.9633 | 0.0873 |
| 157 | ---             | 0.0957 | 0.4989 | 0.0946 | 2.8364 | 3.5255 | ---    |
| 158 | 166,167,168,169 | 0.0282 | 0.335  | 0.1517 | 3.6648 | 4.1798 | 1.5283 |
| 159 | 170,171         | 0.011  | 0.1551 | 0.0843 | 1.7944 | 2.0448 | 0.5241 |
| 160 | 172,173         | 0.01   | 0.1467 | 0.0823 | 1.7147 | 1.9538 | 0.5292 |
| 161 | 174             | 0.0072 | 0.1279 | 0.0851 | 1.5801 | 1.8003 | 0.0332 |
| 162 | 175             | 0.0089 | 0.2024 | 0.1608 | 2.6561 | 3.0282 | 0.2679 |
| 163 | 176,177         | 0.0077 | 0.1313 | 0.0845 | 1.6044 | 1.8279 | 0.4339 |

Winter Season- January & February ; Summer season - March, April & May; Southwest monsoon - June, July, August & September; Northeast monsoon - October, November & December
